# Supplementary material
Source: PubMed Central journal article supplement (PMC2755679)
Supplement: supp_M109.004648_jbc.M109.004648-1.pdf [file supp_M109.004648_jbc.M109.004648-1.pdf]

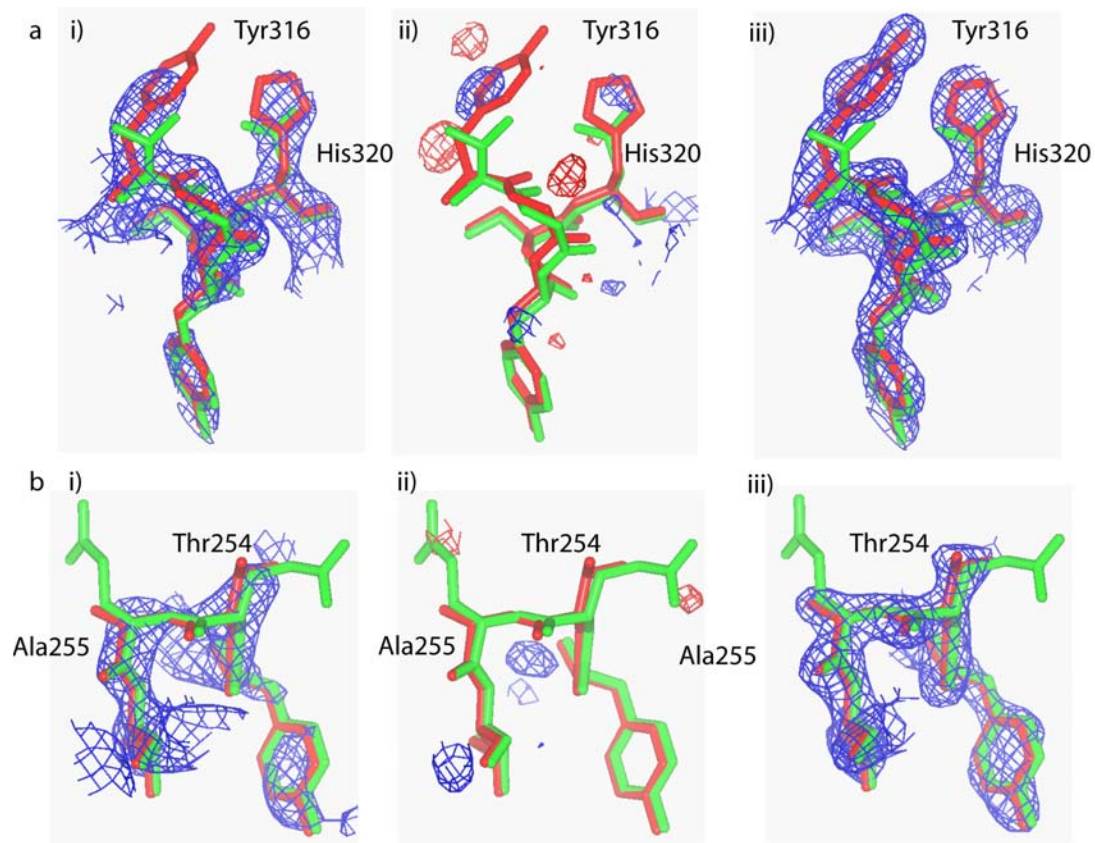

Supplementary Figure 1

**Supplementary Figure 1. Example of excess electron density not explained by *E. coli* model.**

GAPDS (red) and *E. coli* GAPDH (green) are represented with i)  $2|F_{obs}| - |F_{calc}|$  electron density and ii)  $|F_{obs}| - |F_{calc}|$  electron density (+ve in blue mesh, -ve in red mesh) obtained by molecular replacement, and iii) final weighted electron density after refinement with a) an example of excess electron density not explained by *E. coli* model at residues Tyr 316 and His 320 (GAPDS) and b) an example of negative difference electron density where Thr 254 and Ala 255 in GAPDS replace a glutamate and a glutamine (*E. coli*) respectively.
