# Supplementary material
Source: PubMed Central journal article supplement (PMC2755679)
Supplement: supp_M109.004648_jbc.M109.004648-2.pdf [file supp_M109.004648_jbc.M109.004648-2.pdf]

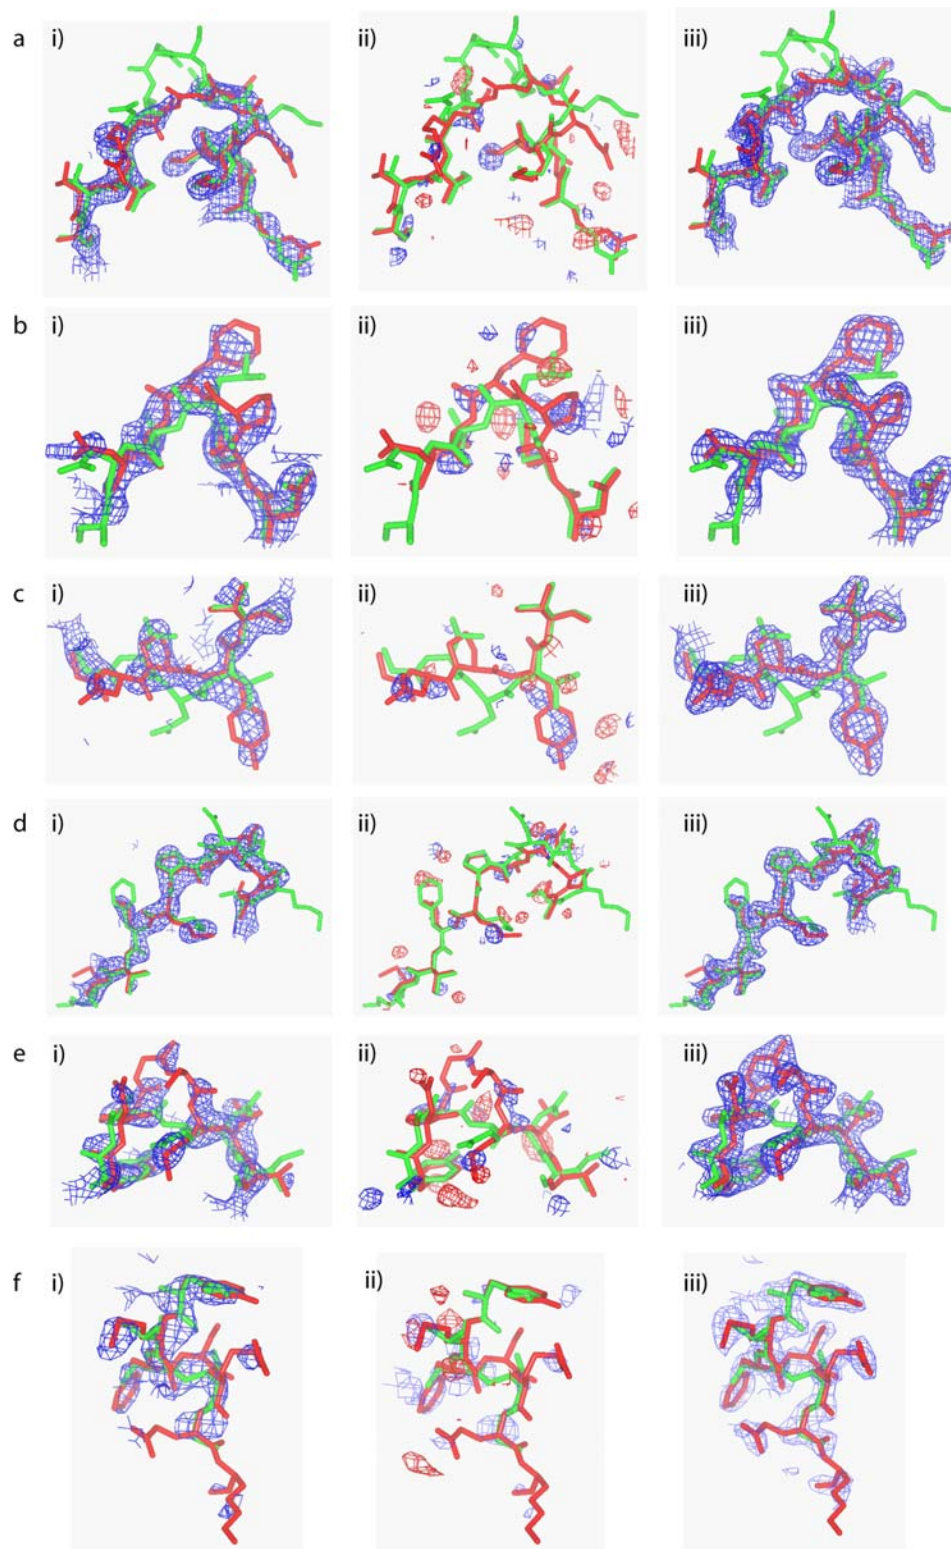

Supplementary Figure 2

**Supplementary Figure 2. Electron density where primary sequence differences between GAPDS and *E. coli* GAPDH lead to alteration in the peptide backbone position.**

GAPDS (red) and *E. coli* GAPDH (green) are shown in stick representation with i)  $2|F_{obs}| - |F_{calc}|$  electron density (blue mesh) and ii)  $|F_{obs}| - |F_{calc}|$  electron density (+ve in blue mesh, -ve in red mesh) obtained by molecular replacement, and iii) final weighted electron density map after refinement (blue mesh) for a) region I, b) region II, c) region III, d) region IV, e) region V, f) region VI as described in supplementary table 1.
